# Supplementary material
Source: publisher site journal article supplement (https://www.dovepress.com/article/493074)
Supplement: Supplementary file 1 [file get_supplementary_file.php]

**Supplementary materials**

Table S1 The Factors and Levels of BBD

| Factors | Level | | |
| --- | --- | --- | --- |
| -1 | 0 | +1 |
| CA7 (X1) | 5 | 6 | 7 |
| Lecithin (X2) | 125 | 137.5 | 150 |
| Cholesterol (X3) | 5 | 10 | 15 |

Table S2 Hemolysis Test Scheme

| Number | CA7-LP (mg/mL) | 2% hematocyte (mL) | Ultrapure water (mL) | saline (mL) | CA7-LP dissolved in saline (mL) |
| --- | --- | --- | --- | --- | --- |
| 1 | 0.05 | 2.5 | 0 | 0 | 2.5 |
| 2 | 0.1 | 2.5 | 0 | 0 | 2.5 |
| 3 | 0.2 | 2.5 | 0 | 0 | 2.5 |
| 4 | 0.4 | 2.5 | 0 | 0 | 2.5 |
| 5 | 0.6 | 2.5 | 0 | 0 | 2.5 |
| 6 | 0.8 | 2.5 | 0 | 0 | 2.5 |
| 7 | 0 | 2.5 | 0 | 2.5 | 0 |
| 8 | 0 | 2.5 | 2.5 | 0 | 0 |

Table S3 The experimental design and results of BBD

| Trial number | X1 | X2 | X3 | Y1 | Y2 | Y3 |
| --- | --- | --- | --- | --- | --- | --- |
| 1 | 5.00 | 137.50 | 15.00 | 77.88 | 0.28 | 96.11 |
| 2 | 7.00 | 137.50 | 15.00 | 89.75 | 0.29 | 91.73 |
| 3 | 7.00 | 150.00 | 10.00 | 83.81 | 0.29 | 96.83 |
| 4 | 7.00 | 125.00 | 10.00 | 91.82 | 0.29 | 84.19 |
| 5 | 6.00 | 137.50 | 10.00 | 97.01 | 0.27 | 96.49 |
| 6 | 6.00 | 150.00 | 5.00 | 85.58 | 0.30 | 97.73 |
| 7 | 6.00 | 137.50 | 10.00 | 93.19 | 0.26 | 96.65 |
| 8 | 6.00 | 150.00 | 15.00 | 79.08 | 0.29 | 97.31 |
| 9 | 5.00 | 137.50 | 5.00 | 78.60 | 0.29 | 97.40 |
| 10 | 6.00 | 137.50 | 10.00 | 94.95 | 0.26 | 97.36 |
| 11 | 6.00 | 125.00 | 5.00 | 74.03 | 0.28 | 92.42 |
| 12 | 5.00 | 150.00 | 10.00 | 91.81 | 0.29 | 97.85 |
| 13 | 6.00 | 137.50 | 10.00 | 90.54 | 0.27 | 98.93 |
| 14 | 6.00 | 125.00 | 15.00 | 83.67 | 0.30 | 92.42 |
| 15 | 6.00 | 137.50 | 10.00 | 95.92 | 0.27 | 97.93 |
| 16 | 7.00 | 137.50 | 5.00 | 81.01 | 0.31 | 87.05 |
| 17 | 5.00 | 125.00 | 10.00 | 74.52 | 0.27 | 97.12 |

X1: Weight of CA7 (mg), X2: Weight of Lecithin (mg), X3: Weight of Cholesterol (mg), Y1: Particle size, Y2: Polydispersity index, Y3: Encapsulation efficiency (%).

Table S4 Variance Analysis Results

| Response variables | Source | Sum of Squares | df | Mean Square | F-value | p-value |
| --- | --- | --- | --- | --- | --- | --- |
| PS | Model | 900.1 | 9 | 100.01 | 21.54 | 0.0003 |
| Lack of Fit | 6.74 | 3 | 2.25 | 0.3488 | 0.7933 |
| A-CA7 | 69.44 | 1 | 69.44 | 14.96 | 0.0062 |
| B-Lecithin | 32.95 | 1 | 32.95 | 7.1 | 0.0323 |
| C-Cholesterol | 15.59 | 1 | 15.59 | 3.36 | 0.1096 |
| PDI | Model | 0.0028 | 9 | 0.0003 | 17.44 | 0.0005 |
| Lack of Fit | 0.0001 | 3 | 0 | 2.36 | 0.2128 |
| A-CA7 | 0.0004 | 1 | 0.0004 | 22.91 | 0.002 |
| B-Lecithin | 0.0001 | 1 | 0.0001 | 2.95 | 0.1296 |
| C-Cholesterol | 1.13E-06 | 1 | 1.13E-06 | 0.0642 | 0.8073 |
| EE | Model | 267.12 | 9 | 29.68 | 29.16 | < 0.0001 |
| Lack of Fit | 3.15 | 3 | 1.05 | 1.05 | 0.4606 |
| A-CA7 | 102.78 | 1 | 102.78 | 100.98 | < 0.0001 |
| B-Lecithin | 69.44 | 1 | 69.44 | 68.22 | < 0.0001 |
| C-Cholesterol | 1.1 | 1 | 1.1 | 1.08 | 0.3339 |
